# Supplementary material for: Embryonic Stem Cells Modulate the Cancer-Permissive Microenvironment of Human Uveal Melanoma
Source: PubMed Central journal article supplement (PMC6643444; doi:10.7150/thno.33139), 2019-07-09
Supplement: thnov09p4764s1.pdf [file thnov09p4764s1.pdf]

## Supplemental Material

**Table S1. Primer sequences**

| <b>Primer</b>     | <b>Forward</b>             | <b>Reverse</b>              |
|-------------------|----------------------------|-----------------------------|
| Human-GAPDH       | CGTATTGGGCGCCTGGTCAC       | ATGATGACCCTTTTGGCTCC        |
| Human-cyclin A2   | CGCTGGCGGTACTGAAGTC        | GAGGAACGGTGACATGCTCA<br>T   |
| Human-KLF4        | TCTCAAGGCACACCTGCGAA       | TAGTGCCTGGTCAGTTCATC        |
| Human-p21         | TGTCCGTCAGAACCCATGC        | AAAGTCGAAGTTCATCGCTC        |
| Human-p27         | TAATTGGGGCTCCGGCTAACT      | TGCAGGTCGCTTCCTTATTCC       |
| Human-F2RL1       | TTGTGTTTGTGGTGGGTTTGC      | ACCAGATGACAGAGAGGAGG<br>T   |
| Human-PDK2        | CTTCAGCAAGTTCTCCCCGTC      | TCGGGAAGCAGGTTGATCTC<br>T   |
| Human-TXNIP       | GCCAGCCAACCTCAAGAGACAA     | TTCGAGCAGAGACAGACACC<br>C   |
| Human-BRMS1       | GCCTCCAAGCAAAGACACAGA      | AGCTCTCCTTCTGACTCTG<br>T    |
| Human-PDK1        | AGAGGGTTACGGGACAGATGC      | GTCTTTGGGTTCTCTGCTGG<br>G   |
| Human-CD44        | ATGGGTTTCATAGAAGGGCACG     | TGTCATACTGGGAGGTGTTG<br>GA  |
| Human-RhoA        | TTGTTGGTGATGGAGCCTGTG      | GCCAACTCTACCTGCTTTCCA       |
| Human-GAB1        | CAGACAGCGAGGAGGAGATG<br>A  | GGTGGATGGTGGTGCTGTAT<br>T   |
| Human-PTEN        | CTCAGCCGTTACCTGTGTGTG      | AGGTTTCCTCTGGTCCTGGTA       |
| Human-AKT2        | AGGCACGGGCTAAAGTGAC        | CTGTGTGAGCGACTTCATCCT       |
| Human-AKT3        | GGAGAGGAAGAGATGGATGC<br>CT | CCACTTGCCTTCTCTCGAACC       |
| Human-mTOR        | CCCTCCATCCACCTCATCAGT      | CGCCAAGACACAGTAGCGAA<br>T   |
| Human-PIK3CG      | AACACCGACCTCACAGTTTTT      | CTCAAGCCACACATTCCACAG       |
| Human-cyclin B1   | GGTTGTTGCAGGAGACCATGT      | AACATGGCAGTGACACCAAC<br>C   |
| Human-cyclin D1   | TTCATTTCCAATCCGCCCTCC      | TGTGAGGCGGTAGTAGGACA<br>G   |
| Human-FGF2        | AGAAGAGCGACCCTCACATCA      | CGGTTAGCACACACTCCTTTG       |
| Human-MMP1        | AAAATTACACGCCAGATTTGC<br>C | GGTGTGACATTACTCCAGAGT<br>TG |
| Human-MMP9        | AGACCTGGGCAGATTCCAAAC      | CGGCAAGTCTTCCGAGTAGT        |
| Human-VEGF-A      | CCTCCGAAACCATGAACTTT       | CCACTTCGTGATGATTCTGC        |
| Human-VEGF-B      | GATGGCCTGGAGTGTGTG         | CACACTGGCTGTGTTCTTCC        |
| Human-VE-cadherin | TGTTACGCATCGGTTGTTCA       | TACATGACAGAGGCGTGGTC<br>T   |

|               |                       |                            |
|---------------|-----------------------|----------------------------|
| Human- VEGF-C | GGCTGGCAACATAACAGAGA  | GTGGCATGCATTGAGTCTTT       |
| Human- FAK    | GTTATCCCAGTCCGAGGTCCA | TGACCTGGATAGATGCTGCC<br>A  |
| Mouse- Gapdh  | AGTGTTTCCTCGTCCCGTAGA | TGAGGTCAATGAAGGGGTCTG<br>T |
| Mouse- F2r1   | AGTTCTCTGCGTCCATCCTCA | GCGGGGTGTTTCTTCTTCGTT      |
| Mouse- Pik3cg | TGCGGAGTTCTACCACCGAT  | TAATGCAGGCAGTCTAGGGT<br>C  |
| Mouse-p21     | TCTTCCCCATCTTCGGCCTTA | AGTTTGGAGACTGGGAGAGG<br>G  |

**Table S2. Antibodies, source and dilution**

| Antibody       | Source              | Dilution(application)     |
|----------------|---------------------|---------------------------|
| AKT1/2/3       | Abcam#ab131443      | 1:10000(WB)<br>1:100(IF)  |
| p27            | Abcam#ab32034       | 1:1000 (WB)<br>1:100 (IF) |
| MMP1           | Abcam#ab38929       | 1:1000(IF)                |
| mTOR           | Abcam#ab2732        | 1:2000(WB)<br>1:100(IF)   |
| PTEN           | Abcam#ab32199       | 1:10000(IF)               |
| cyclinA2       | Abcam#32386         | 1:10000 (WB)<br>1:200(IF) |
| p21            | Abcam#109520        | 1:2000 (WB)<br>1:1000(IF) |
| F2RL1          | Abcam#180953        | 1:2000 (WB)<br>1:100(IF)  |
| cyclinB1       | Abcam#181593        | 1:2000 (WB)<br>1:500(IF)  |
| PDK2           | Novusbio#NBPI-87307 | 1:200(WB)<br>1:100(IF)    |
| KLF4           | Abcam#215036        | 1:10000(WB)               |
| VEGF-A         | Abcam#46154         | 1:100(WB)                 |
| cyclinD1       | Abcam#134175        | 1:10000(WB)<br>1:50(IF)   |
| FGF2           | Abcam#8880          | 1:1000(WB)<br>1:200(IF)   |
| TXNIP          | Abcam#188865        | 1:1000(WB)                |
| BRMS1          | Abcam#57082         | 1:100(WB)                 |
| $\beta$ -actin | SIGMA#A5441         | 1:3000(WB)                |
| MMP9           | Abcam#38929         | 1:250(IF)                 |

|                                        |                         |            |
|----------------------------------------|-------------------------|------------|
| VE-cadherin                            | Abcam#33168             | 1:100(IF)  |
| CD34                                   | Abcam#8158              | 1:50(IF)   |
| PCNA                                   | Cell Signaling#D3H8P    | 1:800(IF)  |
| Alexa Fluor 594 donkey anti-rabbit IgG | Molecular Probes#A21207 | 1:1000(IF) |

**Table S3. Delta CT means of genes in C918 cells with VO**

|             | Ctrl-T |       |       | TCo   |       |       | TCo+VO |       |       | Ctrl-C |       |       | CCo   |       |       | CCo+VO |       |       |
|-------------|--------|-------|-------|-------|-------|-------|--------|-------|-------|--------|-------|-------|-------|-------|-------|--------|-------|-------|
| cyclinA2    | 7.60   | 7.34  | 7.37  | 7.41  | 7.64  | 7.63  | 7.11   | 7.01  | 7.06  | 8.07   | 7.70  | 8.68  | 7.68  | 7.30  | 8.16  | 7.60   | 7.34  | 7.37  |
| cyclinB1    | 5.97   | 5.74  | 6.01  | 6.63  | 6.42  | 6.97  | 6.19   | 5.72  | 5.59  | 6.10   | 6.29  | 6.02  | 5.80  | 5.84  | 5.95  | 5.86   | 5.98  | 5.69  |
| cyclinD1    | 6.01   | 5.77  | 4.87  | 7.74  | 7.12  | 6.41  | 6.14   | 5.86  | 5.89  | 5.97   | 7.08  | 6.40  | 5.00  | 5.90  | 5.38  | 4.92   | 6.35  | 5.83  |
| FGF2        | 9.68   | 9.02  | 9.68  | 10.07 | 9.20  | 9.92  | 10.01  | 9.01  | 9.41  | 10.46  | 9.34  | 10.23 | 9.93  | 9.08  | 10.16 | 9.68   | 9.02  | 9.59  |
| MMP1        | 14.97  | 14.97 | 14.97 | 15.43 | 15.20 | 15.89 | 14.54  | 14.30 | 14.49 | 16.01  | 16.08 | 15.83 | 15.98 | 15.74 | 15.38 | 14.97  | 15.44 | 14.97 |
| MMP9        | 13.60  | 14.93 | 14.87 | 14.92 | 16.00 | 15.80 | 14.30  | 16.12 | 16.32 | 15.99  | 14.90 | 16.23 | 16.57 | 15.17 | 16.31 | 14.93  | 13.60 | 14.25 |
| VEGF-A      | 8.70   | 10.90 | 8.35  | 9.23  | 11.40 | 8.95  | 8.25   | 10.32 | 8.23  | 9.43   | 8.49  | 10.49 | 7.96  | 5.99  | 8.20  | 8.08   | 6.55  | 8.35  |
| VEGF-B      | 0.18   | 7.19  | 7.64  | 0.76  | 8.05  | 8.44  | -0.05  | 7.04  | 7.16  | -0.23  | 7.43  | 8.52  | -0.78 | 7.05  | 8.04  | 0.18   | 8.03  | 9.24  |
| VE-cadherin | 8.60   | 9.81  | 9.46  | 9.39  | 10.15 | 10.45 | 9.13   | 10.02 | 10.28 | 11.28  | 10.29 | 10.64 | 10.59 | 10.09 | 10.16 | 9.81   | 9.00  | 8.60  |
| p21         | 5.18   | 5.03  | 4.96  | 4.85  | 5.01  | 4.27  | 5.21   | 6.09  | 4.85  | 5.04   | 4.27  | 4.62  | 5.20  | 4.70  | 5.07  | 5.18   | 5.03  | 4.96  |
| p27         | 8.28   | 8.22  | 8.24  | 7.50  | 7.76  | 7.74  | 7.66   | 7.83  | 8.04  | 7.76   | 7.77  | 7.62  | 7.99  | 7.70  | 7.78  | 8.28   | 8.22  | 8.24  |
| PIK3CG      | 10.62  | 12.21 | 11.25 | 11.77 | 13.18 | 11.99 | 11.36  | 13.04 | 11.66 | 10.99  | 9.87  | 9.95  | 11.52 | 10.61 | 11.04 | 11.77  | 11.17 | 10.92 |
| PDK1        | 9.33   | 11.27 | 8.87  | 9.80  | 12.04 | 9.05  | 9.49   | 11.15 | 8.43  | 8.87   | 9.44  | 9.78  | 9.17  | 9.89  | 10.27 | 8.98   | 9.50  | 9.83  |
| PDK2        | 9.59   | 8.98  | 10.01 | 10.05 | 9.67  | 10.45 | 9.78   | 9.23  | 9.90  | 9.59   | 8.98  | 9.58  | 10.82 | 10.09 | 10.47 | 9.97   | 9.41  | 10.11 |
| AKT2        | 19.53  | 20.88 | 19.79 | 20.02 | 21.09 | 20.50 | 18.87  | 20.08 | 18.93 | 18.87  | 18.28 | 19.79 | 19.75 | 20.30 | 20.97 | 19.33  | 18.89 | 20.34 |
| AKT3        | 9.16   | 9.02  | 9.50  | 9.54  | 9.54  | 9.68  | 8.84   | 8.82  | 9.54  | 9.16   | 8.27  | 9.76  | 9.75  | 8.92  | 10.13 | 9.05   | 8.53  | 9.65  |
| mTOR        | 8.77   | 8.15  | 8.95  | 9.84  | 9.66  | 9.39  | 9.01   | 8.34  | 8.67  | 8.95   | 9.27  | 8.86  | 9.32  | 10.12 | 9.24  | 8.79   | 9.16  | 8.93  |

**Table S4. Delta CT means of genes in C918 cells**

|      | Ctrl  |       |       | TCo   |       |       | CCo   |       |       |
|------|-------|-------|-------|-------|-------|-------|-------|-------|-------|
| CD44 | -0.75 | 3.74  | 4.03  | 0.32  | 5.38  | 5.71  | -0.38 | 4.02  | 4.47  |
| RhoA | 4.62  | 4.28  | 4.45  | 4.52  | 3.96  | 3.97  | 5.16  | 4.62  | 5.16  |
| GAB1 | 10.92 | 11.01 | 11.38 | 10.23 | 10.18 | 10.92 | 12.16 | 11.81 | 12.49 |
| PTEN | 8.07  | 0.79  | 1.47  | 7.09  | -0.10 | 0.93  | 7.73  | 0.43  | 1.30  |

**Table S5. Delta CT means of genes in RPE and C918 cells**

|           | RPE-Ctrl |       |       | RPE-ESC |       |       | C918-Ctrl |       |       | C918-ESC |       |       |
|-----------|----------|-------|-------|---------|-------|-------|-----------|-------|-------|----------|-------|-------|
| PAR2      | 11.32    | 13.90 | 5.57  | 9.94    | 11.43 | 3.55  | 15.06     | 12.64 | 9.63  | 12.70    | 10.01 | 7.66  |
| PIK3CG    | 13.05    | 13.05 | 4.56  | 12.00   | 12.35 | 3.98  | 6.53      | 10.94 | 6.53  | 7.37     | 11.52 | 6.86  |
| PDK1      | 10.20    | 8.63  | 8.99  | 8.88    | 7.09  | 8.43  | 7.93      | 7.93  | 4.07  | 8.62     | 9.04  | 8.16  |
| PDK2      | 8.84     | 2.55  | 7.87  | 8.00    | 1.92  | 7.48  | 9.59      | 9.59  | 8.08  | 9.64     | 9.77  | 9.02  |
| AKT2      | 19.89    | 20.73 | 13.52 | 19.55   | 20.16 | 12.56 | 14.34     | 14.54 | 20.03 | 14.54    | 14.70 | 20.27 |
| AKT3      | 8.67     | 8.67  | 2.27  | 7.99    | 8.26  | 1.81  | 2.07      | 9.02  | 7.50  | 2.51     | 9.44  | 8.75  |
| mTOR      | 2.96     | 2.54  | 2.54  | 2.75    | 2.02  | 2.33  | 8.66      | 8.82  | 8.93  | 9.74     | 9.47  | 9.33  |
| PTEN      | 6.13     | 5.25  | 6.95  | 6.47    | 6.01  | 7.23  | 7.96      | 7.96  | 7.75  | 7.45     | 7.75  | 7.65  |
| cyclin A2 | 8.01     | 8.49  | 9.01  | 7.84    | 7.25  | 7.33  | 6.94      | 8.02  | 6.78  | 7.31     | 8.79  | 8.04  |
| cyclin B1 | 6.82     | 5.97  | 7.00  | 6.70    | 5.98  | 5.42  | 4.02      | 3.79  | 4.99  | 4.71     | 4.97  | 5.94  |
| cyclin D1 | 5.29     | 5.08  | 5.45  | 4.95    | 3.95  | 4.18  | 4.60      | 3.33  | 4.84  | 5.97     | 4.94  | 6.38  |
| p21       | 4.41     | 6.00  | 5.27  | 5.99    | 6.61  | 6.11  | 5.98      | 6.43  | 5.98  | 5.32     | 5.44  | 5.61  |
| p27       | 7.58     | 7.51  | 6.96  | 8.05    | 8.17  | 7.81  | 9.68      | 9.36  | 9.93  | 9.32     | 9.04  | 9.97  |
| KLF4      | 9.01     | 12.61 | 10.99 | 7.22    | 10.22 | 8.94  | 6.97      | 6.66  | 9.07  | 8.87     | 10.40 | 9.83  |

**Table S6. Delta CT means of genes in skin tissues**

|               | PBS  |      |      |      |      |      | ESC  |      |      |      |      |     |      | ESC-CM |      |      |      |      |      |
|---------------|------|------|------|------|------|------|------|------|------|------|------|-----|------|--------|------|------|------|------|------|
| <i>F2RL1</i>  | 4.91 | 4.82 | 4.15 | 4.35 |      |      | 3.9  | 3.76 | 3.56 |      |      |     |      |        | 4.05 | 4.84 | 4.91 |      |      |
| <i>PIK3CG</i> | 7.16 | 7.82 | 7.44 | 8.25 | 7.17 | 8.02 | 6.17 | 7.55 | 7.04 | 7.22 | 6.79 |     |      |        | 7.49 | 7.63 | 8.6  | 8.15 | 8.02 |
| <i>p21</i>    | 0.68 | 0.4  | 0.41 | 0.35 |      |      | 0.83 | 1.61 | 0.97 | 0.91 | 1.74 | 0.4 | 0.11 | 0.43   | 0.79 | 1.03 | 0.3  | 1.48 |      |

**Table S7. Delta CT means of genes in tumor tissues**

|               | PBS   |       |       |       |       |       | ESC   |       |       |       |       | ESC-CM |      |       |       |       |       |       |
|---------------|-------|-------|-------|-------|-------|-------|-------|-------|-------|-------|-------|--------|------|-------|-------|-------|-------|-------|
| <i>F2RL1</i>  | 10    | 10.56 | 9.98  | 10.11 | 11.06 | 10.03 | 9.32  | 9.8   | 9.72  | 9.89  |       | 10.05  | 9.7  | 9.8   | 10.4  | 10.15 |       |       |
| <i>PIK3CG</i> | 10.15 | 10.14 | 11.21 | 10.71 | 11.43 |       | 12.57 | 11.76 | 11.65 | 12.11 | 11.57 | 11.36  | 11   | 11.28 | 11.02 | 11.26 | 11.42 | 11.21 |
| <i>p21</i>    | 5.13  | 5.64  | 5.22  | 5.4   |       |       | 4.61  | 4.88  | 5.3   |       |       | 5.33   | 5.59 | 5.44  | 5.57  |       |       |       |

**Figure S1**

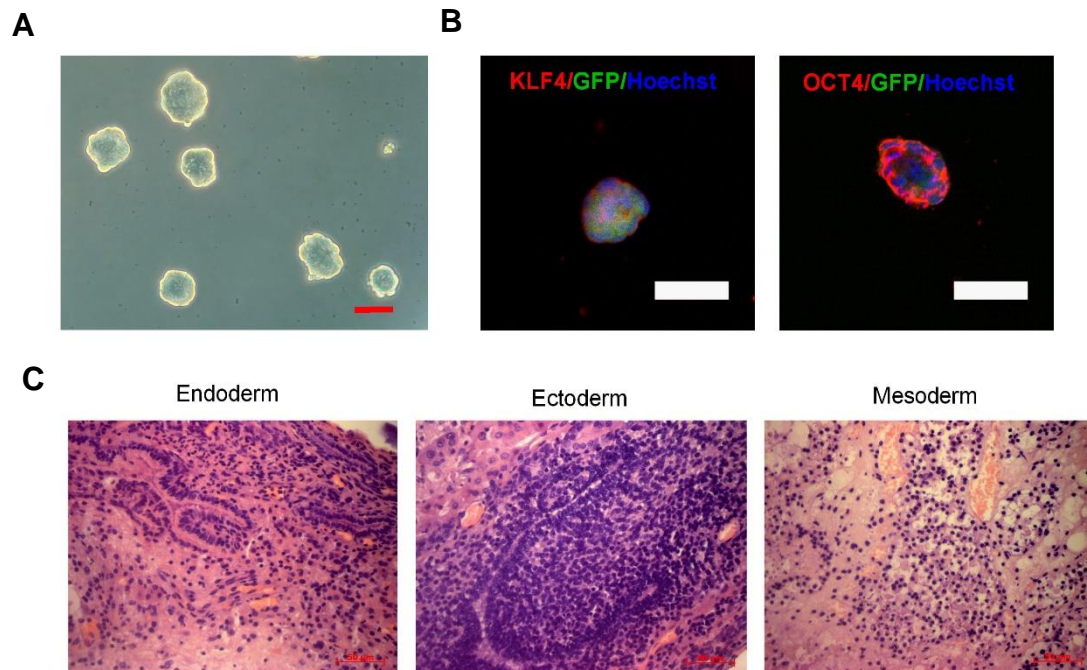

**Figure S1. Characteristics of ESCs. (A)** Representative images of morphology by phase microscopy. **(B)** The expression of KLF4, OCT4 and GFP as determined by immunofluorescent staining. **(C)** Teratoma formed by ESCs stained with hematoxylin and eosin for histological analysis. Scale bar, 50  $\mu$ m. **(A-C)**



**Figure S2**

**A**

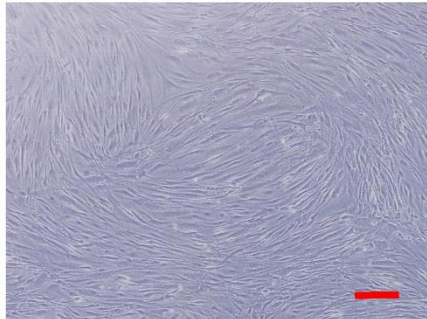

**B**

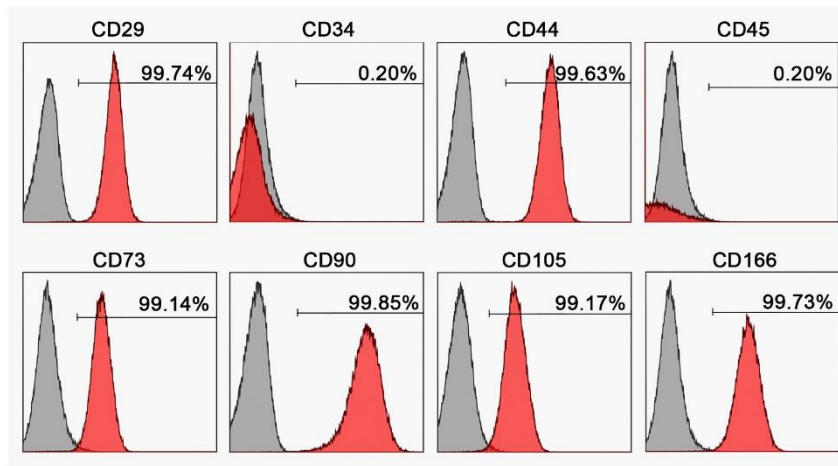

**C**

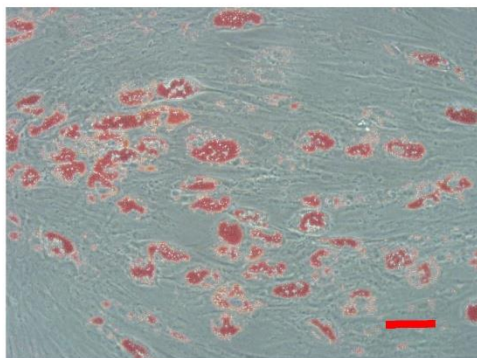

**D**

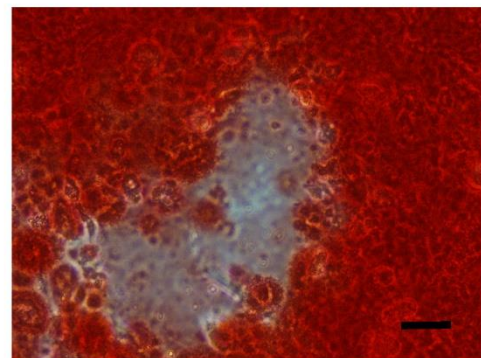

**Figure S2. Characteristics of MSCs. (A)** Representative images of morphology by phase microscopy. Scale bar, 100  $\mu$ m. **(B)** Flow cytometry analysis of cell surface markers of MSCs. **(C)** Oil red O staining showing

adipogenic differentiation of MSCs. **(D)** Alizarin red S staining showing osteogenic differentiation of MSCs. Scale bar, 50  $\mu\text{m}$ . **(C-D)**

**Figure S3**

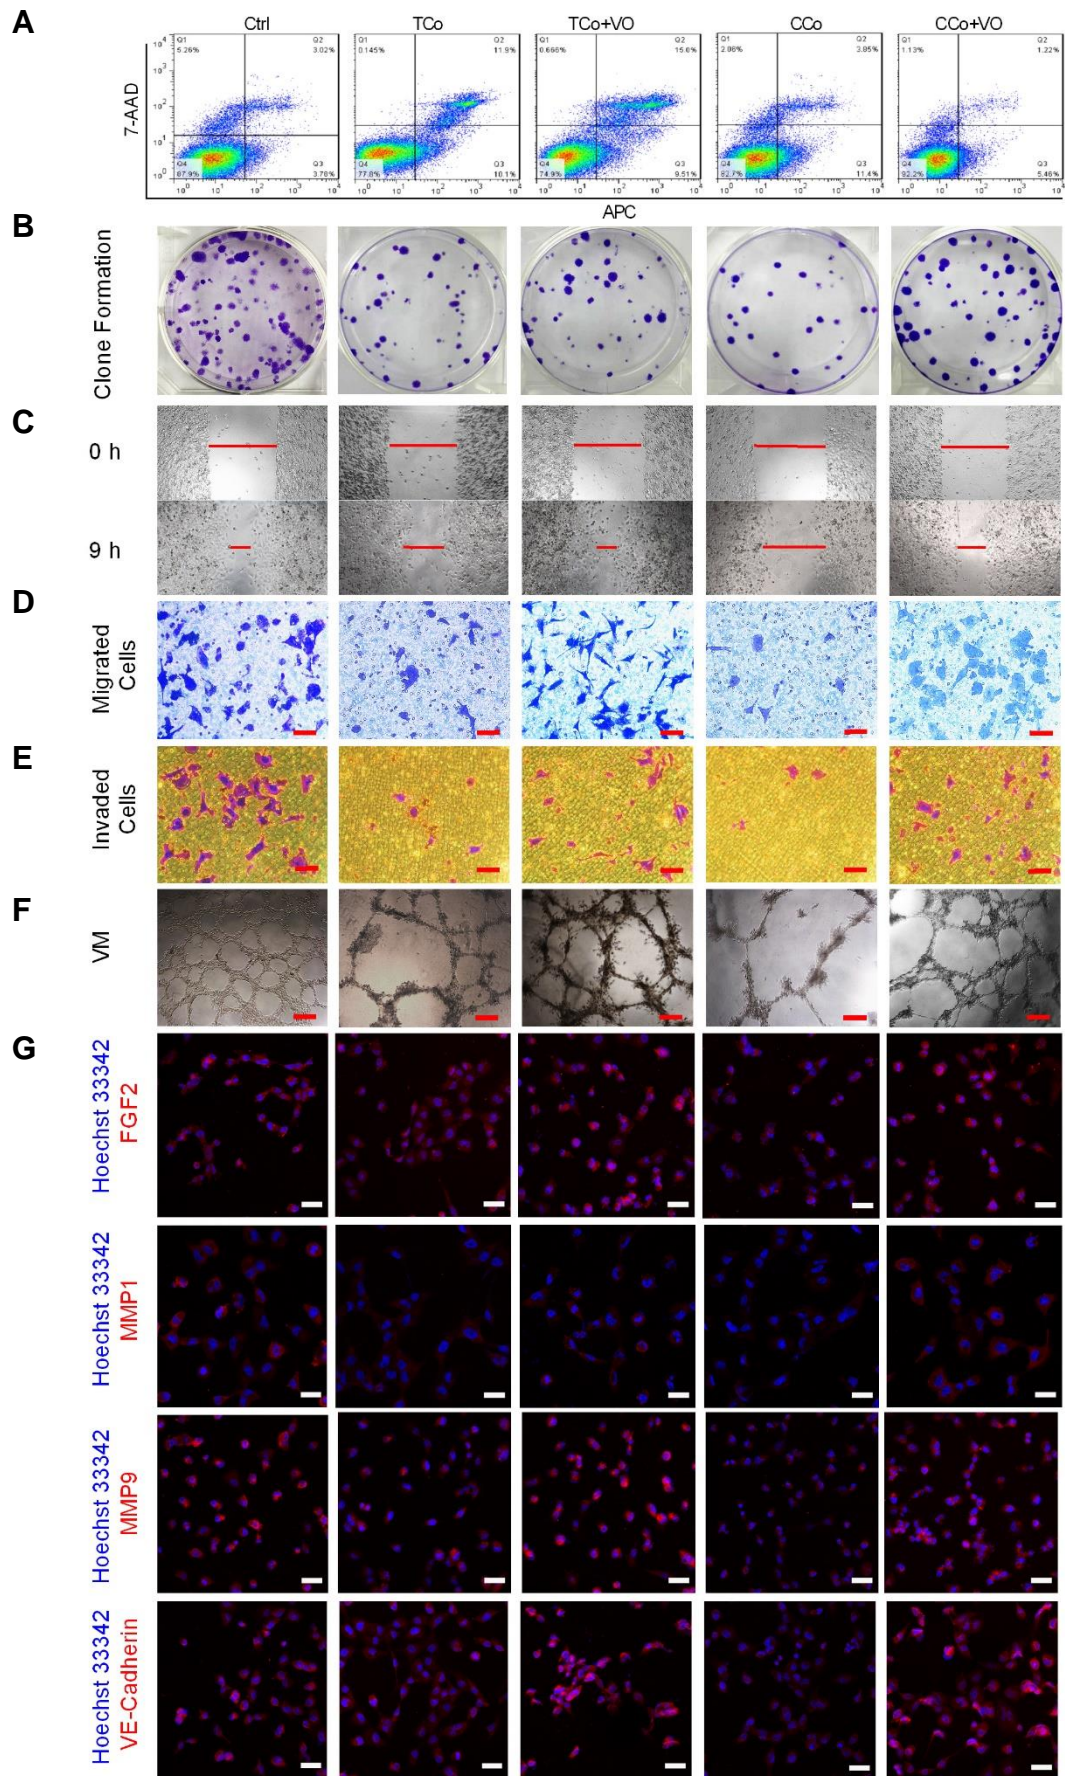

**Figure S3. The ESCMe significantly inhibits the growth and metastasis capacity of C918 cells. (A)** Scatter diagram of the proportions of apoptotic C918 cells sorted from Ctrl, TCo, TCo+VO, CCo, and CCo+VO groups, as assessed by flow cytometry. **B-F**, Representative images of clone formation **(B)**, wound healing at 0 and 9 h **(C)**, migration **(D)**, invasion **(E)**, and VM **(F)** of C918 cells sorted from Ctrl, TCo, TCo+VO, CCo, and CCo+VO groups. **(G)**, Immunofluorescence assays of FGF2, MMP1, MMP9, and VE-cadherin in C918 cells sorted from Ctrl, TCo, TCo+VO, CCo, and CCo+VO groups. Scale bars: 100  $\mu\text{m}$  **(D-E)**, 400  $\mu\text{m}$  **(F)**, and 50  $\mu\text{m}$  **(G)**.



**Figure S4**

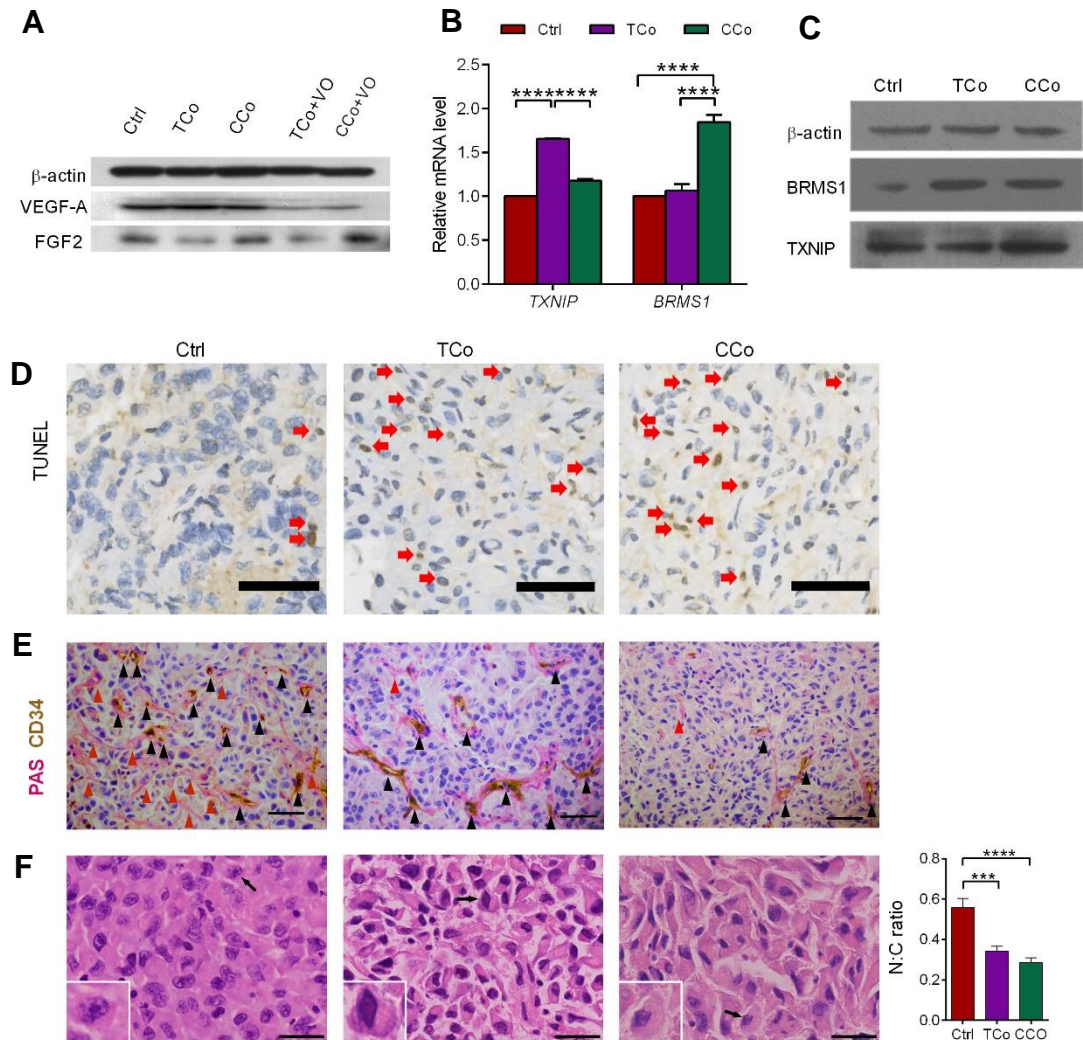

**Figure S4. C918 cells treated with ESCs have reduced malignancy and tumorigenesis. (A)** Western blotting of VEGF-A and FGF2 in C918 cells.  $\beta$ -actin served as the internal control. **B-C**, RT-qPCR (**B**) and Western blot analyses (**C**) of TXNIP and BRMS1 in C918 cells sorted from Ctrl, TCo, and CCo groups (n = 3 biological repeats).  $\beta$ -actin served as the internal control. **(D)** TUNEL assay of tumor tissues obtained from mice subcutaneously injected with C918 cells sorted from Ctrl, TCo, or CCo groups. Arrows mark

apoptotic cells. **(E)**, PAS-CD34 staining of tumor tissues obtained from mice subcutaneously injected with C918 cells sorted from Ctrl, TCo, or CCo groups. Red arrowheads mark VM; black arrowheads mark normal endothelial-dependent vessels. **(F)** H&E staining of tumor tissues obtained from mice subcutaneously injected with C918 cells sorted from Ctrl, TCo, or CCo groups and N:C ratio analysis. . Scale bar, 50  $\mu$ m. **(D-F)** Data are means  $\pm$  SEMs. \*\*P < 0.01; \*\*\*P < 0.001; \*\*\*\*P < 0.0001.

**Figure S5**

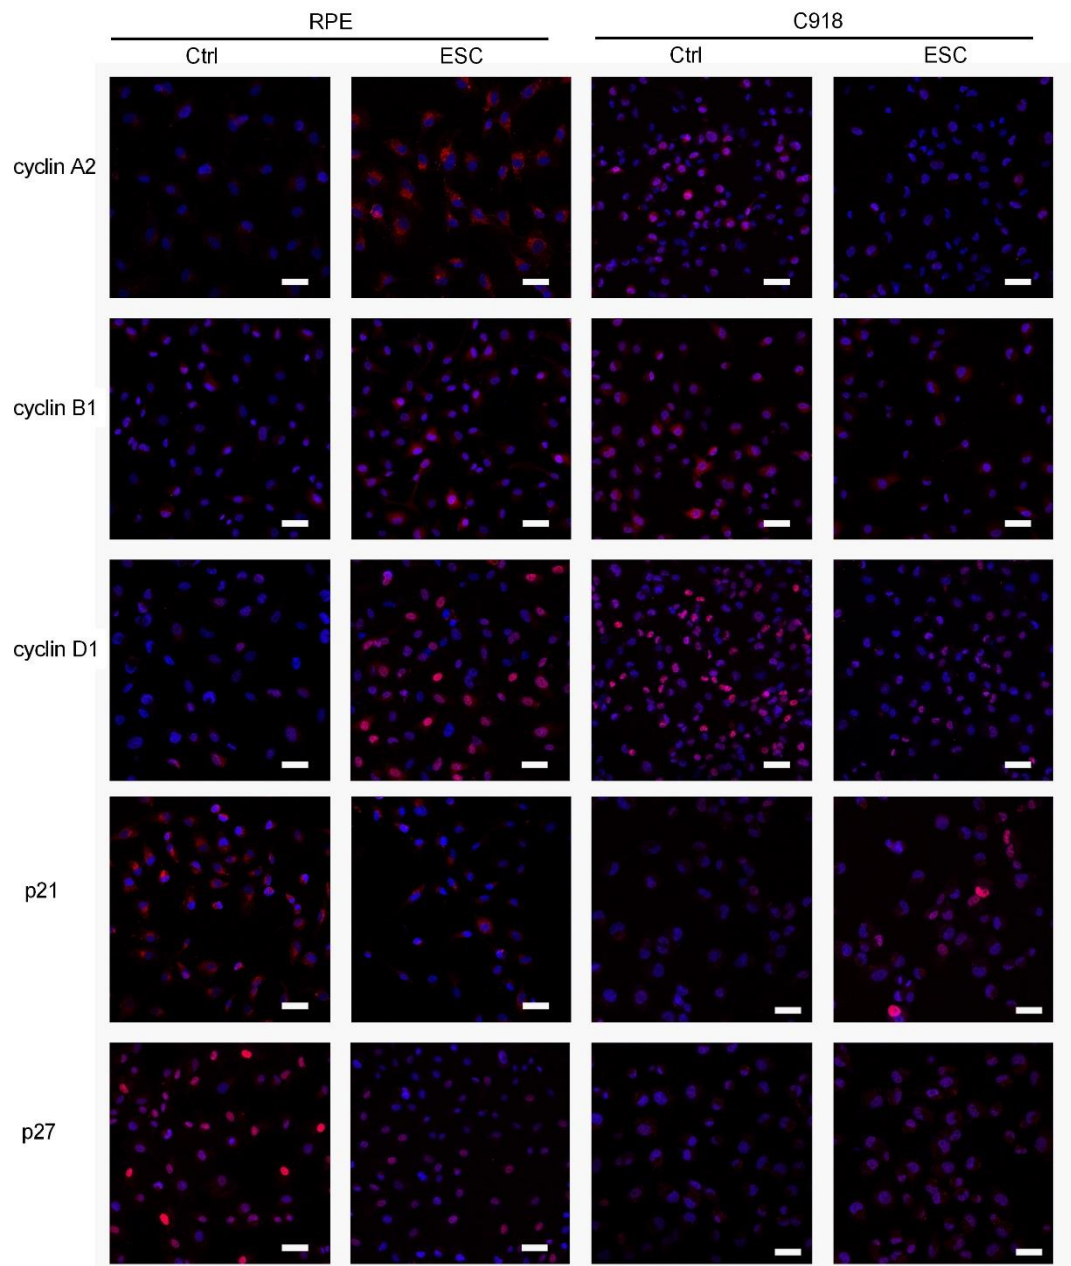

**Figure S5. The ESCMe influences the expression of cell cycle promoters and senescence markers.** Immunofluorescence staining of cell cycle promoters (cyclin A2, cyclin B1, cyclin D1) and senescence markers (p21, and

p27) in RPE and C918 cells sorted from the Ctrl group (C918 cells co-cultured with RPE cells) and ESC group (C918 cells co-cultured with RPE cells and ESCs). Scale bar, 50  $\mu$ m.

**Figure S6**

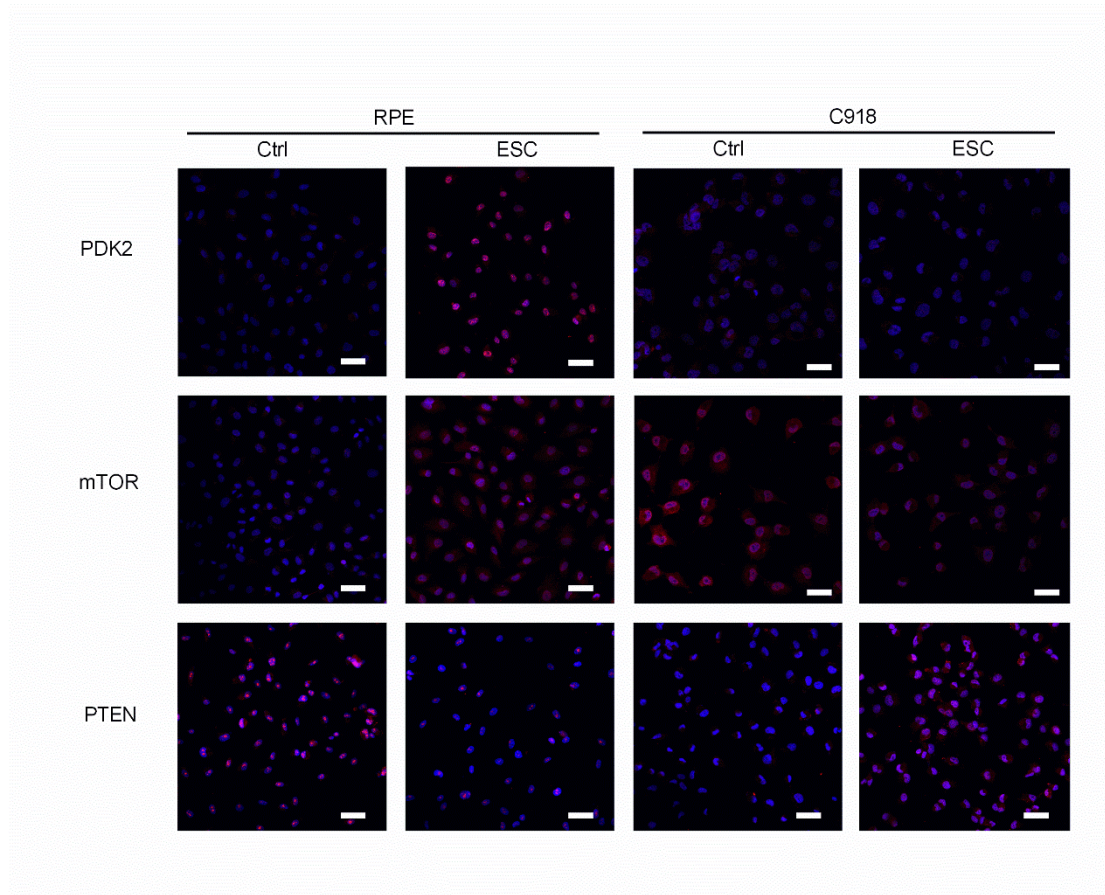

**Figure S6. ESC treatment alters the expression of PI3K pathway factors in RPE cells and C918 cells.** Immunofluorescence staining of PDK2, MTOR, and PTEN in RPE and C918 cells sorted from the Ctrl and ESC groups. Scale bar, 50  $\mu$ m.



**Figure S7**

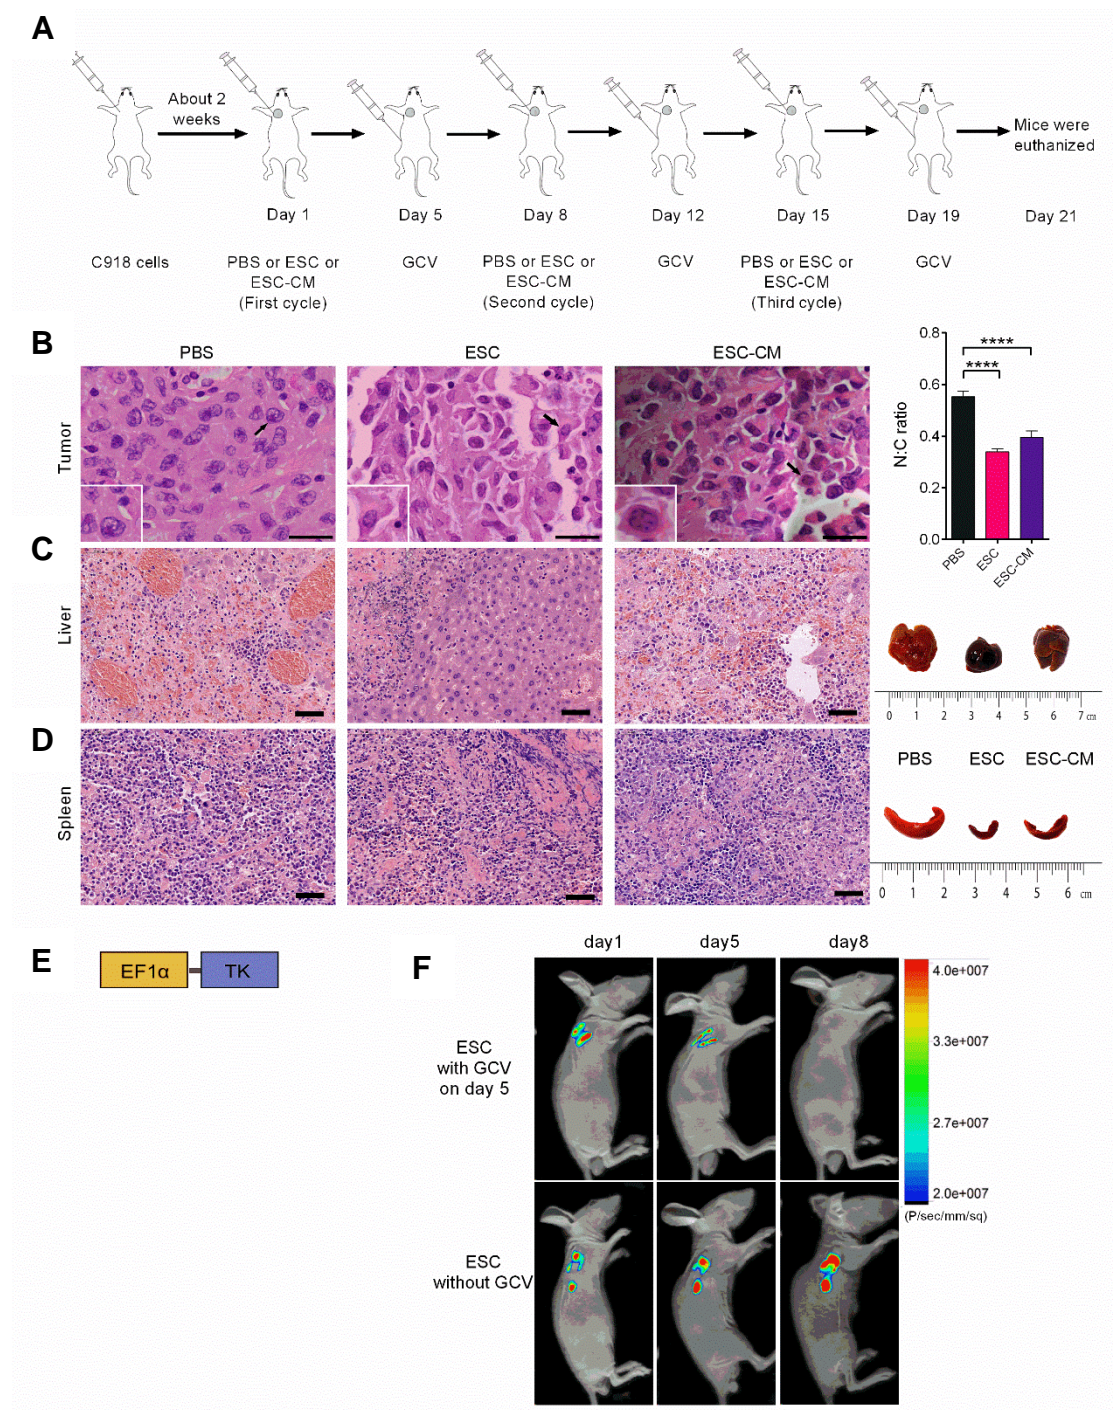

**Figure S7. The ESCMe suppresses C918 tumor growth in xenograft mouse models. (A)** Schematic workflow of the *in vivo* experiment. Mice were subcutaneously injected with C918 cells and then treated with PBS, ESCs, or ESC-CM. **(B)** H&E staining of tumor tissue and N:C ratio analysis. **(C)-(D)**, Representative images of H&E staining in the livers and spleens of mice treated with PBS, ESCs, or ESC-CM. **(E)** Sketch map of the TK suicide gene. **(F)** In vivo imaging of ESCs dyed with DiR. Scale bar, 50  $\mu$ m. **(B-D)** Data are means  $\pm$  SEMs. \*P < 0.05; \*\*P < 0.01; \*\*\*P < 0.001; \*\*\*\*P < 0.0001.
